# Supplementary material for: Sharing and Specificity of Co-expression Networks across 35 Human Tissues
Source: PLoS Comput Biol. 2015 May 13;11(5):e1004220. doi: 10.1371/journal.pcbi.1004220 (PMC4430528; doi:10.1371/journal.pcbi.1004220)
Supplement: S9 Table — The second column denotes the percentage of links that appear in the first network that also appear in the second; the third column denotes the ratio of observed shared links to shared links expected if there were no relationship between the networks. (XLSX) [file pcbi.1004220.s011.xlsx]

## Sheet: Sheet1
Table S9: The fraction of links preserved between networks learned with different values of sparsit parameter lambda_p
lambda_p values	Links in First Network that Appear in Second	Shared : Expected Ratio
4 and 0	0.75	302 (p < 10^-6)
4 and 2	0.89	320 (p < 10^-6)
4 and 8	0.98	281 (p < 10^-6)
8 and 0	0.65	261 (p < 10^-6)
